# Supplementary material for: Novel genetic variants in long non-coding RNA MEG3 are associated with the risk of asthma
Source: PeerJ. 2023 Jan 27;11:e14760. doi: 10.7717/peerj.14760 (PMC9885862; doi:10.7717/peerj.14760)
Supplement: Supplemental Information 1 [file peerj-11-14760-s001.xlsx]

## Sheet: 工作表1
Control	rs7158663	rs3087918	rs11160608	rs4081134		Case	rs7158663	rs3087918	rs11160608	rs4081134
1	GG	TT	AA	GG		1	GG	GT	AC	GG
2	GG	TT	AC	GG		2	AG	GT	AC	GG
3	AG	GG	AC	GG		3	GG	TT	AA	AG
4	GG	GT	AA	AG		4	AG	GG	CC	AA
5	AA	GT	CC	AA		5	GG	TT	CC	AG
6	AG	GT	AA	GG		6	GG	GT	AC	GG
7	AG	GG	CC	GG		7	AG	GT	AC	GG
8	GG	TT	CC	AG		8	GG	TT	AA	AG
9	GG	GT	AA	GG		9	AG	GG	CC	AG
10	AG	GT	CC	GG		10	GG	GT	AC	GG
11	GG	TT	AC	AG		11	AA	GT	AA	AA
12	GG	GT	AA	GG		12	AG	GT	CC	GG
13	AG	GT	AC	AG		13	GG	TT	AA	AG
14	GG	TT	CC	GG		14	AG	GT	AC	GG
15	AG	GG	AA	AA		15	GG	TT	AA	AG
16	GG	GT	AC	AG		16	GG	GT	AA	GG
17	GG	TT	CC	AG		17	AG	GG	AC	AG
18	AG	GG	AA	GG		18	GG	GT	AC	GG
19	GG	TT	AC	AG		19	GG	TT	AA	AG
20	GG	TT	AA	GG		20	AG	GT	AC	GG
21	GG	GT	AC	GG		21	AG	GT	AC	GG
22	AG	GT	CC	AG		22	GG	GT	AC	GG
23	GG	TT	AA	GG		23	AA	GG	CC	AG
24	AA	GG	CC	AG		24	AG	GT	AC	GG
25	GG	TT	AA	GG		25	GG	TT	AA	AG
26	AG	GT	AC	GG		26	AG	GG	AC	GG
27	GG	GT	AA	AG		27	GG	TT	AA	AG
28	GG	TT	AC	GG		28	AA	GT	AC	GG
29	AG	GT	AA	AG		29	AG	GG	CC	AG
30	GG	TT	AC	GG		30	AG	GT	AA	AG
31	AG	TT	CC	GG		31	GG	GT	AC	GG
32	GG	GT	AC	GG		32	GG	TT	AA	AG
33	AG	GT	AA	AG		33	AG	GT	CC	AA
34	GG	TT	CC	AA		34	GG	GT	AC	GG
35	AG	GT	AC	GG		35	GG	GT	AA	GG
36	AA	GT	AA	AG		36	AG	GG	AC	AG
37	GG	TT	AC	GG		37	GG	TT	CC	AG
38	GG	GT	CC	GG		38	AG	GT	AC	GG
39	AG	GG	AC	AG		39	GG	GT	AC	GG
40	GG	TT	AC	GG		40	AA	GG	AA	AG
41	AA	GG	AA	AG		41	AG	GT	AC	GG
42	GG	GT	AC	AG		42	AG	GT	AC	GG
43	GG	TT	CC	AG		43	GG	GT	AC	GG
44	AG	GT	AA	GG		44	GG	TT	AA	AG
45	AG	GT	AC	GG		45	AG	GG	CC	AG
46	AG	TT	AA	AG		46	AG	GT	AC	GG
47	AA	GT	AC	GG		47	AA	GG	AC	AG
48	GG	TT	CC	AG		48	AA	GT	AA	AG
49	GG	GT	AC	GG		49	AG	GT	AC	GG
50	AG	GT	AA	AA		50	GG	TT	AA	AG
51	GG	TT	CC	AG		51	AA	GT	AC	GG
52	GG	GT	AA	GG		52	AG	GT	AC	GG
53	GG	TT	AC	GG		53	AG	GT	AA	AG
54	AG	GG	AC	GG		54	AG	GT	CC	GG
55	GG	TT	AA	GG		55	GG	GT	AC	GG
56	AG	GT	AC	AG		56	GG	TT	AA	AG
57	GG	TT	CC	GG		57	AG	GT	AC	GG
58	AG	TT	AA	GG		58	AG	GG	CC	AG
59	GG	TT	CC	GG		59	GG	TT	AA	AG
60	GG	GT	AC	AG		60	AG	GT	AC	GG
61	AA	GG	AC	GG		61	GG	TT	AA	AG
62	GG	TT	AA	AG		62	AG	TT	CC	AG
63	AG	GT	AC	GG		63	GG	GT	AC	GG
64	GG	GT	AC	GG		64	AG	GT	AC	GG
65	GG	TT	AC	GG		65	GG	TT	AA	AG
66	GG	TT	CC	GG		66	AG	GT	AA	GG
67	AA	GG	AA	AG		67	AG	GT	AC	GG
68	AG	TT	AC	AA		68	GG	TT	AA	AG
69	GG	TT	CC	GG		69	AA	GG	CC	AG
70	AG	GT	AA	AG		70	AG	GT	AC	GG
71	AG	GT	AC	GG		71	GG	TT	AA	AA
72	GG	TT	AC	GG		72	AG	TT	AA	GG
73	GG	GT	AA	AG		73	GG	GT	AC	GG
74	GG	TT	AC	GG		74	AG	GG	CC	AG
75	AG	GT	AC	GG		75	GG	GT	AC	GG
76	GG	TT	CC	AG		76	GG	TT	AA	AG
77	AA	GG	CC	GG		77	AG	GT	AA	AG
78	GG	TT	AC	GG		78	GG	TT	AA	AG
79	GG	GT	AC	AG		79	AG	GT	AC	GG
80	AG	GT	AA	GG		80	AG	GT	CC	AA
81	GG	TT	AC	GG		81	GG	TT	AA	AG
82	GG	GT	AA	GG		82	AA	GT	AC	GG
83	AG	GG	AC	AG		83	GG	GT	AC	GG
84	GG	TT	CC	AG		84	AG	GT	AC	GG
85	GG	GT	AC	AG		85	GG	TT	AA	AG
86	AG	GT	AA	AA		86	GG	GT	AC	GG
87	GG	TT	AC	GG		87	AG	GT	AC	GG
88	GG	GT	AC	AG		88	GG	TT	CC	AG
89	GG	TT	CC	AG		89	AG	TT	AA	GG
90	AG	TT	AC	GG		90	GG	GT	AC	GG
91	GG	GT	AA	AG		91	AG	GG	CC	AG
92	GG	TT	AC	GG		92	GG	GT	AC	GG
93	AA	GG	AA	GG		93	AA	GG	CC	AG
94	GG	TT	AC	AG		94	AG	GT	AC	GG
95	AG	GT	AA	AG		95	AG	TT	AA	AG
96	GG	GT	AC	GG		96	GG	GT	AC	GG
97	GG	TT	CC	GG		97	GG	TT	AA	AG
98	GG	TT	AC	AG		98	AG	GT	AC	GG
99	GG	TT	AC	GG		99	GG	TT	AA	AG
100	AG	GG	CC	AA		100	AA	GT	AC	GG
101	GG	TT	AA	GG		101	AG	GG	AC	AA
102	GG	TT	CC	AG		102	GG	TT	AA	AG
103	AG	GT	AC	GG		103	AG	GT	CC	GG
104	AG	GG	AA	GG		104	GG	GT	AC	GG
105	GG	TT	AC	GG		105	AG	TT	AA	AG
106	AG	GT	AC	GG		106	GG	TT	AC	AG
107	GG	GT	AA	AG		107	AG	GT	AC	GG
108	AA	TT	AC	GG		108	AA	GG	CC	AG
109	AG	GT	AC	GG		109	GG	TT	AC	GG
110	GG	TT	AA	AG		110	AG	TT	AA	AG
111	GG	TT	AC	GG		111	AG	GT	AC	GG
112	GG	GT	AA	GG		112	AG	GT	AC	GG
113	AG	GG	AC	GG		113	GG	TT	AC	GG
114	GG	TT	AA	AG		114	GG	GT	AC	GG
115	GG	GT	AC	GG		115	AG	GT	AC	GG
116	AG	TT	CC	AG		116	GG	TT	AA	AG
117	GG	TT	AC	GG		117	GG	TT	AC	GG
118	GG	TT	AA	AA		118	AG	TT	CC	AA
119	AG	GT	AC	AG		119	AG	GT	AC	GG
120	GG	TT	CC	GG		120	GG	TT	AA	AG
121	GG	GT	AA	AG		121	AG	GT	AC	AG
122	AG	GG	CC	GG		122	AG	GG	AC	GG
123	GG	TT	CC	AG		123	GG	GT	AA	GG
124	AG	GT	AC	GG		124	AG	GT	AA	AG
125	AA	GG	AA	GG		125	AA	GT	CC	AG
126	GG	TT	AC	GG		126	GG	TT	AA	GG
127	AG	GT	AC	AG		127	AG	GT	AC	GG
128	GG	TT	CC	GG		128	AG	GG	CC	AG
129	GG	GT	AA	GG		129	AG	GT	AC	GG
130	AG	GG	AC	GG		130	GG	TT	AA	AG
131	GG	TT	AA	AG		131	GG	TT	AC	GG
132	AG	GT	AC	GG		132	AG	TT	AA	AG
133	GG	GT	AC	AG		133	GG	TT	AC	GG
134	GG	TT	CC	GG		134	AG	GG	CC	AG
135	AG	TT	AC	GG		135	GG	TT	AA	GG
136	AA	GT	AA	AG		136	AG	GT	AA	AG
137	GG	TT	AC	GG		137	AA	GG	CC	GG
138	AG	GT	AC	GG		138	GG	TT	AA	AG
139	AG	GT	AA	GG		139	AG	GT	AC	GG
140	GG	TT	AC	AG		140	GG	TT	AA	AG
141	GG	TT	AA	GG		141	AG	GT	AC	GG
142	GG	GT	AC	GG		142	AG	GG	CC	AG
143	GG	TT	CC	AG		143	GG	TT	AC	GG
144	AG	GG	AA	GG		144	GG	TT	AA	AG
145	GG	GT	AC	AG		145	AG	GT	AC	GG
146	GG	TT	CC	GG		146	AG	TT	CC	AG
147	AG	GT	AC	GG		147	GG	TT	AA	AG
148	GG	TT	AA	AG		148	AA	GT	AC	GG
149	AG	GT	AC	AG		149	AG	GT	AC	GG
150	AG	GG	CC	AG		150	GG	TT	AA	AG
151	GG	TT	AC	GG		151	GG	GT	AC	GG
152	GG	GT	AA	GG		152	AG	GG	CC	AG
153	GG	TT	AC	GG		153	AA	GT	AC	GG
154	AG	GT	AA	GG		154	AG	TT	AA	AG
155	GG	TT	AC	AG		155	GG	TT	CC	AG
156	AG	GT	AC	GG		156	GG	GT	AC	GG
157	GG	TT	AC	GG		157	AG	TT	AA	AA
158	AA	GG	CC	AG		158	AA	GG	AC	AG
159	AG	GT	AC	GG		159	GG	GT	AC	GG
160	GG	TT	AC	AG		160	AG	GT	AC	GG
161	AG	TT	AA	GG		161	GG	TT	AA	AG
162	GG	TT	AC	GG		162	AA	GT	AC	GG
163	GG	GT	AC	AG		163	AG	TT	CC	AG
164	AG	GG	CC	GG		164	GG	TT	AA	GG
165	GG	TT	AA	AG		165	AG	GT	AC	GG
166	AG	GT	AC	GG		166	AG	GG	CC	AG
167	GG	TT	AA	AA		167	GG	TT	AC	GG
168	AG	GT	AC	GG		168	GG	TT	AA	AG
169	GG	TT	CC	GG		169	AG	GT	AC	GG
170	AA	GT	AA	AG		170	AA	GG	AC	AA
171	GG	TT	CC	GG		171	GG	TT	AA	AG
172	AG	GG	CC	GG		172	AG	GT	AC	GG
173	GG	GT	AC	AG		173	GG	TT	CC	GG
174	GG	TT	AA	AG		174	AA	GT	AC	GG
175	AG	GT	AC	AG		175	AG	TT	AA	AG
176	GG	TT	AA	AG		176	GG	TT	AC	GG
177	GG	GT	AC	GG		177	GG	TT	AA	GG
178	GG	TT	AA	AA		178	AG	GT	AC	AA
179	AG	TT	AC	GG		179	AG	GG	CC	AG
180	GG	TT	CC	AG		180	GG	TT	AC	GG
181	AA	GG	AC	GG		181	AA	GT	AC	GG
182	AG	GT	AC	AG		182	AG	TT	AA	AG
183	GG	TT	AC	GG		183	GG	TT	AA	AA
184	GG	GT	AC	GG		184	GG	GT	AC	GG
185	AG	GT	AA	AG		185	AG	GG	CC	AG
186	GG	TT	AC	AG		186	GG	TT	AC	GG
187	AG	GG	CC	GG		187	AA	GT	AC	GG
188	GG	GT	AA	AG		188	AG	TT	AC	GG
189	GG	TT	CC	GG		189	GG	TT	AA	AG
190	AG	GT	AC	GG		190	AG	GT	AC	GG
191	AG	GT	AA	GG		191	AA	GG	AC	AA
192	GG	TT	AC	AG		192	GG	TT	AA	AG
193	AG	GG	AC	GG		193	AG	GT	AC	GG
194	AA	GT	AA	AG		194	AA	GT	AC	GG
195	GG	TT	AC	AG		195	GG	TT	AA	AG
196	AG	GT	AC	AG		196	AG	GG	AA	GG
197	GG	GT	AA	GG		197	AG	GT	AC	GG
198	GG	TT	CC	GG		198	GG	TT	CC	AG
199	AG	GT	AC	GG
200	GG	TT	AC	AG
201	GG	TT	AA	GG
202	AG	GT	AC	GG
203	GG	TT	AC	GG
204	AG	GG	AC	AG
205	GG	TT	AA	AG
206	AG	GT	AC	GG
207	AG	TT	CC	AG
208	AG	GG	AC	AG
209	GG	TT	CC	GG
210	AG	GT	AA	AG
211	GG	TT	AC	GG
212	GG	GT	AC	GG
213	AA	GG	CC	AG
214	AG	GT	AA	AG
215	GG	TT	AC	GG
216	GG	GT	AC	GG
217	AG	GT	AC	GG
218	GG	TT	AA	AG
219	AG	GT	CC	GG
220	GG	GT	AC	GG
221	AG	GT	AC	AG
222	GG	TT	AC	GG
223	GG	GT	AA	AG
224	AG	GG	CC	GG
225	GG	GT	AC	AG
226	GG	TT	AA	GG
227	AG	GT	AC	AG
228	GG	GT	AC	GG
229	AG	GT	AA	GG
230	AG	GT	AA	AG
231	GG	TT	CC	GG
232	AG	GG	CC	AG
233	GG	GT	AC	GG
234	GG	TT	AA	AG
235	AG	TT	AC	AA
236	GG	TT	AC	GG
237	GG	GT	AA	AG
238	AG	GT	AC	GG
239	GG	GT	AC	GG
240	GG	TT	AC	AG
241	GG	GT	AC	GG
242	AA	GG	AA	AG
243	AG	TT	CC	GG
244	GG	TT	AC	AG
245	GG	TT	CC	GG
246	AG	GT	AA	AG
247	GG	TT	AC	GG
248	GG	GT	AA	AG
249	AG	GT	AC	GG
250	GG	TT	AC	AG
251	AG	TT	CC	GG
252	GG	TT	AC	GG
253	AG	GT	AA	AG
254	AG	GT	AC	GG
255	AG	GG	CC	AA
256	GG	TT	AC	AG
257	AA	GT	AA	GG
258	AG	GG	AC	AG
259	GG	TT	AC	GG
260	GG	GT	AA	AG
261	AG	GT	AC	GG
262	GG	TT	CC	AG
263	AG	GT	AC	GG
264	GG	GT	AC	GG
265	GG	TT	AA	AG
266	AG	GT	AC	GG
267	GG	GT	AC	GG
268	GG	TT	AC	AG
269	AA	GG	CC	AG
270	AG	GT	AA	AG
271	GG	TT	AC	GG
272	GG	TT	AC	AG
273	AG	GT	CC	AG
274	GG	TT	AC	GG
275	AG	GT	CC	AA
276	GG	TT	AA	GG
277	GG	GT	AC	AG
278	AG	GG	CC	AG
279	GG	TT	AC	GG
280	GG	GT	AA	GG
281	GG	TT	CC	AG
282	AG	GT	AC	GG
283	GG	TT	AA	AA
284	AA	GT	AC	GG
285	AG	GG	CC	AG
286	GG	TT	CC	GG
287	GG	GT	AA	GG
288	GG	TT	CC	AG
289	AG	GT	AC	GG
290	GG	TT	AA	AA
291	AG	GT	AC	GG
292	AG	TT	AA	AG
293	AA	GG	CC	AG
294	AG	GT	AC	AG
295	GG	TT	CC	AG
296	GG	GT	AC	GG
297	GG	TT	CC	AG
298	AG	GT	AC	GG
299	GG	TT	CC	GG
300	GG	GT	AA	AG
301	GG	TT	AC	GG
302	AG	GT	AA	GG
303	GG	TT	AC	AG
304	GG	GT	AA	GG
305	AG	GG	CC	AG
306	GG	TT	AA	AA
307	GG	TT	CC	AG
308	AG	GG	CC	GG
309	GG	GT	AC	GG
310	AG	GT	AC	GG
311	GG	TT	AA	AG
312	GG	TT	AC	GG
313	AG	GT	AC	GG
314	GG	GT	AC	AG
315	GG	TT	CC	AG
316	AG	GT	AC	GG
317	GG	TT	AA	AA
318	AA	GT	AC	AG
319	GG	GT	AC	GG
320	AG	GT	AA	AG
321	GG	TT	CC	GG
322	GG	GT	AC	GG
323	AG	GG	AA	AG
324	GG	GT	AC	GG
325	GG	TT	AC	GG
326	AG	GT	AC	GG
327	GG	GT	AA	AG
328	GG	GT	AC	GG
329	AG	TT	AA	AA
330	GG	TT	AC	AG
331	GG	TT	CC	GG
332	AA	GG	AC	AG
333	AG	GT	AC	GG
334	GG	TT	AC	AG
335	AG	GG	AA	AG
336	GG	GT	AC	GG
337	AG	TT	CC	AG
338	GG	TT	AC	GG
339	AG	TT	AA	AA
340	GG	GT	AC	AG
341	GG	TT	AC	GG
342	AG	GT	AA	AG
343	GG	TT	AC	GG
344	AG	GT	AC	AG
345	GG	GT	AC	GG
346	GG	TT	AC	GG
347	AG	GT	AA	AG
348	GG	GT	AC	GG
349	AG	GG	CC	AG
350	AG	TT	AC	GG
351	AA	GT	AA	AA
352	GG	TT	AC	AG
353	AG	TT	CC	AG
354	GG	GT	AA	GG
355	AG	GG	AC	AG
356	AG	TT	AC	GG
357	GG	TT	AA	GG
358	AG	GG	CC	AG
359	GG	GT	AC	GG
360	GG	TT	AA	GG
361	AG	GT	AC	AG
362	GG	GT	AC	GG
363	AG	GT	AA	GG
364	GG	GT	AC	GG
365	GG	TT	AC	AG
366	AG	GT	AA	GG
367	GG	GT	AC	GG
368	GG	TT	CC	AG
369	AG	GG	CC	GG
370	GG	GT	AA	AG
371	AG	GT	AC	GG
372	GG	GT	AC	GG
373	AG	GG	AA	AG
374	GG	TT	AC	GG
375	AG	GT	AC	GG
376	AA	GG	AA	AA
377	GG	GT	AC	AG
378	GG	TT	AA	GG
379	GG	GT	AC	GG
380	AG	GT	AC	AG
381	GG	TT	AA	AG
382	GG	GT	AC	GG
383	AA	GT	AA	GG
384	GG	TT	AC	GG
385	AG	GT	AC	AG
386	GG	GT	AA	GG
387	AG	GT	AC	GG
388	GG	TT	AC	AG
389	GG	GT	AA	AG
390	AG	GG	AC	GG
391	GG	TT	AC	GG
392	AG	GT	AC	GG
393	GG	GT	AA	AG
394	GG	TT	AC	GG
395	GG	GT	AA	GG
396	AG	GT	AC	AG
397	GG	TT	AC	GG
398	AG	GT	CC	GG
399	GG	GT	AA	GG
400	AG	GT	AC	AG
401	GG	TT	AC	GG
402	GG	GT	AA	GG
403	GG	TT	AA	AA
404	AG	GT	AC	GG
405	GG	GT	AC	GG
406	AA	GG	AA	AG
407	GG	TT	AC	GG
408	AG	GT	AA	GG
409	GG	GT	AC	GG
410	GG	TT	AC	AG
411	AG	GT	AA	GG
412	GG	GT	AC	AG
413	GG	GT	AC	GG
414	AG	GT	AC	GG
415	GG	TT	AA	AG
416	GG	GT	AC	GG
417	GG	TT	AA	GG
418	AG	GT	AC	GG
419	GG	GT	AC	GG
420	GG	TT	AC	AG
421	AG	GT	CC	AG
422	AG	GG	AA	AA
423	GG	GT	AC	GG
424	GG	TT	AC	GG
425	AG	GT	CC	AG
426	GG	GT	AA	GG
427	AG	GT	AC	AG
428	GG	TT	AA	GG
429	AG	GT	AC	GG
430	GG	GT	AC	GG
431	AA	GG	AA	AA
432	GG	TT	CC	AA
433	AG	GT	AC	GG
434	GG	TT	AC	AG
435	AG	GT	AA	GG
436	GG	GT	AC	GG
437	AG	GT	AA	GG
438	GG	TT	AC	AG
439	AG	GT	AC	GG
440	GG	GT	AC	GG
441	GG	GT	AA	AG
442	AG	GT	AC	GG
443	GG	TT	CC	AG
444	GG	GT	AA	GG
445	AG	GT	AC	GG
446	GG	TT	AA	AG
447	AG	GT	AC	GG
448	AA	GT	AA	AA
449	AG	GG	CC	AG
450	GG	TT	AC	GG
451	AG	GT	AA	AA
452	GG	GT	AC	GG
453	GG	TT	AA	AG
