# Supplementary material for: Novel genetic variants in long non-coding RNA MEG3 are associated with the risk of asthma
Source: PeerJ. 2023 Jan 27;11:e14760. doi: 10.7717/peerj.14760 (PMC9885862; doi:10.7717/peerj.14760)
Supplement: Supplemental Information 2 [file peerj-11-14760-s002.xlsx]

## Sheet: 工作表1
Patient #	rs7158663	MEG3	average of GG	Mormalization
1	GG	3.75298	3.83722	0.978047
2	GG	3.69158		0.962046
3	GG	3.64553		0.950045
4	GG	4.22114		1.10005
5	GG	4.14439		1.08005
6	GG	4.06764		1.06005
7	GG	4.25951		1.11005
8	GG	3.53041		0.920044
9	GG	3.56878		0.930044
10	GG	3.80286		0.991047
11	GG	3.79519		0.989047
12	GG	3.91415		1.02005
13	GG	3.95252		1.03005
14	GG	3.67623		0.958046
15	GG	3.62634		0.945045
16	GG	3.66472		0.955045
17	GG	3.92566		1.02305
18	GG	3.95636		1.03105
19	GG	3.81438		0.994047
20	GG	3.76449		0.981047
21	GG	3.8067		0.992047
22	AG	2.07603		0.541026
23	AG	2.93945		0.766036
24	AG	2.46745		0.643031
25	AG	2.11824		0.552026
26	AG	2.08371		0.543026
27	AG	2.02615		0.528025
28	AG	2.36384		0.616029
29	AG	2.71304		0.707034
30	AG	1.97626		0.515025
31	AG	1.69613		0.442021
32	AG	2.36		0.615029
33	AG	2.72839		0.711034
34	AG	2.11824		0.552026
35	AG	1.56182		0.407019
36	AG	1.88416		0.491023
37	AG	1.81125		0.472022
38	AG	1.93789		0.505024
39	AG	2.02615		0.528025
40	AG	2.12976		0.555026
41	AA	1.67311		0.436021
42	AA	1.58485		0.41302
43	AA	2.09906		0.547026
44	AA	1.58868		0.41402
45	AA	1.70764		0.445021
46	AA	1.59636		0.41602
